# Supplementary material for: Two waves of coeliac disease incidence in Sweden: a nationwide population-based cohort study from 1990 to 2015
Source: HighWire-hosted journal article supplement (doi:10.1136/gutjnl-2021-324209), 2021-07-28
Supplement: gutjnl-2021-324209supp001_data_supplement.pdf [file gutjnl-2021-324209supp001_data_supplement.pdf]

**Table S1.** Celiac disease incidence studies with time period of 10 years or more

| Study                            | Country     | Study period | Study population | Nation wide | Annual incidence data presented | No. CD cases | Incidence per 100,000 person-yrs (95%CI) | Age- and sex stratified rates |
|----------------------------------|-------------|--------------|------------------|-------------|---------------------------------|--------------|------------------------------------------|-------------------------------|
| <b>Study period ending -2010</b> |             |              |                  |             |                                 |              |                                          |                               |
| Midhagen 1988                    | Sweden      | 1976-1986    | Adults           | No          | No                              | 129          | 8.7 (7.2-10.2) ±                         | No                            |
| Sher 1993                        | UK          | 1975-1989    | All ages         | No          | Incidence at 5-yr intervals     | 106          | 2.5 (2.0-3.0) ±                          | Age but not sex               |
| Bode 1996                        | Denmark     | 1976-1991    | Adults           | No          | Yes                             | 101          | 1.3 (1.0-1.6) ±                          | Yes                           |
| Jansen 1993                      | Netherlands | 1976-1992    | All ages         | Yes         | 1975-1991                       | 1622         | 0.6 (0.57-0.63) ±                        | No                            |
| Vukavic 1995                     | Serbia      | 1980-1993    | Children         | No          | No                              | 201          | 3.5 (3.0-4.0) ±                          | No                            |
| Collin 1997                      | Finland     | 1975-1994    | Adults           | No          | Incidence at 5-yr intervals     | 368          | 9.7 (8.7-10.7) ±                         | No                            |
| Hawkes 2000                      | UK          | 1981-1995    | All ages         | No          | Incidence at 5-yr intervals     | 137          | 2.2 (1.8-2.6) ±                          | Age but not sex               |
| Cook 2004                        | New Zealand | 1970-1999    | All ages         | No          | Yes                             | 416          | 3.7 (3.3-4.1) ±                          | Age but not sex               |
| Lopez-Rodriguez 2003             | Spain       | 1981-1999    | Children         | No          | No                              | 157          | 10.6 (8.9-12.3) ±                        | Age but not sex               |
| Murray 2003                      | US          | 1950-2001    | All ages         | No          | No                              | 82           | 2.1 (1.7-2.6)                            | Yes                           |
| Fowell 2006                      | UK          | 1993-2002    | All ages         | No          | Incidence at 2-yr intervals     | 137          | 8.7 (7.4-10.1)                           | Age but not sex               |
| Collin 2007                      | Finland     | 1980-2003    | Adults           | Yes         | Incidence at 5-yr intervals     | 18,538#      | 15 (estimated from Figure 1)             | No                            |
| Hurley 2012                      | UK          | 1996-2005    | All ages         | No          | Incidence at 5-yr intervals     | 347          | 8.1 (7.3-8.9) ±                          | Age but not sex               |
| McGowan 2009                     | Canada      | 1990-2006    | Children         | No          | No                              | 266 §        | 5.2 (4.5-5.9) ±                          | No                            |
| Rajani 2010                      | Canada      | 1998-2007    | Children         | No          | Yes                             | 158          | 6.5 (5.5-7.5) ±                          | No                            |
| Fernandez 2010                   | Spain       | 1986-2008    | Adults           | No          | No                              | 68           | 2.0 (1.5-2.5)                            | No                            |
| White 2013                       | Scotland    | 1990-2009    | Children         | No          | No                              | 266          | 5.6 (4.9-6.3) ±                          | No                            |
| Dydensborg 2012                  | Denmark     | 1996-2009    | Children         | Yes         | Yes                             | 1188         | 7.1 (6.7-7.5)                            | No                            |
| Ress 2012                        | Estonia     | 1976-2010    | Children         | Yes         | Incidence at 5-yr intervals     | 152          | 1.12 (0.94-1.31)                         | Age but not sex               |
| Ludvigsson 2013                  | US          | 2000-2010    | All              | No          | Yes                             | 249          | 17.4 (15.2-19.6)                         | Yes                           |
| Namatovu 2014                    | Sweden      | 1973-2010    | Children         | Yes *       | Yes                             | 9107         | 25 (estimated)<br>2004-2009: 42          | Age but not sex               |
| Beitnes 2013                     | Norway      | 2000-2010    | Children         | No          | Two 3-year time periods         | 400          | 31.4 (28.3-34.5) ±                       | No                            |
| Burger 2014                      | Netherlands | 1995-2010    | All ages         | Yes         | Incidence at 5 time points      | 4014         | 5.0 (4.85-5.15) Ω                        | Yes                           |
| <b>Study period ending 2011-</b> |             |              |                  |             |                                 |              |                                          |                               |
| West 2014                        | UK          | 1990-2011    | All ages         | Yes         | Yes                             | 9,087        | 13.8 (13.5-14.1)                         | Yes                           |
| Zingone 2013                     | UK          | 1993-2012    | Children         | Yes         | Incidence at 5-yr intervals     | 1247         | 11.9 (11.2-12.5)                         | Yes                           |

|                                         |               |                  |                 |            |                                                                      |                     |                                                                                                                                                    |                 |
|-----------------------------------------|---------------|------------------|-----------------|------------|----------------------------------------------------------------------|---------------------|----------------------------------------------------------------------------------------------------------------------------------------------------|-----------------|
| Tapsas 2015                             | Sweden        | 1973-2013        | Children        | No         | Yes                                                                  | 1030                | 28.2 (26.5-29.9)                                                                                                                                   | Age but not sex |
| Kivela 2015                             | Finland       | 2001-2013        | Children        | No         | Yes                                                                  | N/A                 | 44.0 <sup>^</sup> (estimated from Figure 2)                                                                                                        | No              |
| Almalloouhi 2014                        | US            | 2000-2014        | Children        | No         | Yes                                                                  | 100                 | 17.4 (14.0-20.8)                                                                                                                                   | Yes             |
| Virta 2017                              | Finland       | 2005-2014        | Adults          | Yes        | Incidence at 2-yr intervals                                          | 12,847 <sup>#</sup> | 31 (30-32)                                                                                                                                         | Yes             |
| Grode 2018                              | Denmark       | 1980-2016        | All ages        | Yes        | Incidence at 5-yr intervals                                          | 11,802              | 5.9 (5.8-6.0)                                                                                                                                      | Yes             |
| Van Kalleveen 2018                      | Netherlands   | 2007-2016        | Children        | No         | No                                                                   | 105                 | 21.1 (17.5-25.2)                                                                                                                                   | Sex but not age |
| Stroud 2019                             | UK            | 1993-2017        | All ages        | No         | Incidence at 5-yr intervals                                          | 802                 | 12.8 (11.9-13.7) $\pm$                                                                                                                             | No              |
| <b>Bergman 2020<br/>(current study)</b> | <b>Sweden</b> | <b>1990-2015</b> | <b>All ages</b> | <b>Yes</b> | <b>Yes, plus incidence of<br/>normal duodenal/jejunal<br/>mucosa</b> | <b>44,771</b>       | <b>CD: Incidence: 19.0 (17.3-20.8)<br/>Normal mucosa: Incidence: 174.1 (154.7-193.6)<br/>CD: Lifetime prevalence 2.3% in women and 1.4% in men</b> | <b>Yes</b>      |

Abbreviations: CD=Celiac disease. UK=United Kingdom. US = United States.

\* Up until 1990 based on five counties covering 15% of the Swedish population. Estimated coverage 1991-1997: 40%. Nationwide from 1998. # Includes patients who only have a diagnosis of dermatitis herpetiformis. # This number (18,538) may represent the prevalent number of celiac disease patients rather than the incidence number. § The number of incident celiac disease patients during the two study periods that were compared was actually 235.

$\pm$  The overall incidence data and/or 95% confidence intervals were retrieved from *JA King et al. Incidence of Celiac Disease Is Increasing Over Time: A Systematic Review and Meta-analysis. Am J Gastroenterol. 2020 Apr;115(4):507-525.*

<sup>^</sup> Based on serological positivity (TTG or EMA)

$\Omega$  incidence calculated based on raw numbers in the Table of Burger et al.
