# Supplementary material for: Two waves of coeliac disease incidence in Sweden: a nationwide population-based cohort study from 1990 to 2015
Source: PubMed Central journal article supplement — Gut. 2021 Jul 28;71(6):1088–94. doi: 10.1136/gutjnl-2021-324209 (PMC9120400; doi:10.1136/gutjnl-2021-324209), 2021-07-28
Supplement: gutjnl-2021-324209supp004.pdf [file gutjnl-2021-324209supp004.pdf]

**Two waves of celiac disease incidence in Sweden - A nationwide population-based cohort study from 1990-2015****Appendix:**

Table S2. Number of patients with celiac disease (CD) and total population per age-group throughout the study period (women)

| Age group (years) | CD   | Population |
|-------------------|------|------------|
| 0-4               | 4903 | 6807484    |
| 5-9               | 2654 | 6800592    |
| 10-14             | 2167 | 6783415    |
| 15-19             | 1986 | 6998959    |
| 20-24             | 1803 | 7356953    |
| 25-29             | 1592 | 7613630    |
| 30-34             | 1526 | 7721108    |
| 35-39             | 1432 | 7841025    |
| 40-44             | 1458 | 7952554    |
| 45-49             | 1370 | 7991611    |
| 50-54             | 1336 | 7580420    |
| 55-59             | 1180 | 7085633    |
| 60-64             | 1224 | 6606337    |
| 65-69             | 1075 | 6093861    |
| 70-74             | 933  | 5426959    |
| 75-79             | 768  | 4725717    |
| 80-84             | 456  | 3816833    |
| 85-89             | 148  | 2458612    |
| 90-94             | 25   | 1046497    |
| 95-99             | 1    | 238775     |

Table S3. Number of patients with celiac disease (CD) and total population per age-group throughout the study period (men)

| Age group (years) | CD   | Population |
|-------------------|------|------------|
| 0-4               | 2852 | 7181631    |
| 5-9               | 1532 | 7169238    |
| 10-14             | 1487 | 7152400    |
| 15-19             | 869  | 7398402    |
| 20-24             | 529  | 7684611    |
| 25-29             | 603  | 7966847    |
| 30-34             | 709  | 8083689    |
| 35-39             | 752  | 8171997    |
| 40-44             | 721  | 8241225    |
| 45-49             | 834  | 8255455    |
| 50-54             | 942  | 7772194    |
| 55-59             | 984  | 7152683    |
| 60-64             | 1009 | 6487956    |
| 65-69             | 949  | 5728812    |
| 70-74             | 806  | 4730401    |
| 75-79             | 655  | 3658125    |
| 80-84             | 345  | 2507779    |
| 85-89             | 141  | 1289820    |
| 90-94             | 14   | 413575     |
| 95-99             | 1    | 66480      |

Table S4. Number of patients with normal mucosa and total population per age-group throughout the study period (women)

| Age group (years) | Normal mucosa | Population |
|-------------------|---------------|------------|
| 0-4               | 3998          | 6807484    |
| 5-9               | 2619          | 6800592    |
| 10-14             | 4385          | 6783415    |
| 15-19             | 16419         | 6998959    |
| 20-24             | 24641         | 7356953    |
| 25-29             | 21488         | 7613630    |
| 30-34             | 19218         | 7721108    |
| 35-39             | 19118         | 7841025    |
| 40-44             | 20506         | 7952554    |
| 45-49             | 21241         | 7991611    |
| 50-54             | 19197         | 7580420    |
| 55-59             | 17987         | 7085633    |
| 60-64             | 16263         | 6606337    |
| 65-69             | 14870         | 6093861    |
| 70-74             | 12646         | 5426959    |
| 75-79             | 10421         | 4725717    |
| 80-84             | 6496          | 3816833    |
| 85-89             | 2540          | 2458612    |
| 90-94             | 422           | 1046497    |
| 95-99             | 34            | 238775     |

Table S5. Number of patients with normal mucosa and total population per age-group throughout the study period (men)

| Age group | Normal mucosa | Population |
|-----------|---------------|------------|
| 0-4       | 4952          | 7181631    |
| 5-9       | 2864          | 7169238    |
| 10-14     | 4137          | 7152400    |
| 15-19     | 8068          | 7398402    |
| 20-24     | 11191         | 7684611    |
| 25-29     | 12143         | 7966847    |
| 30-34     | 12056         | 8083689    |
| 35-39     | 12122         | 8171997    |
| 40-44     | 11755         | 8241225    |
| 45-49     | 11908         | 8255455    |
| 50-54     | 11690         | 7772194    |
| 55-59     | 11691         | 7152683    |
| 60-64     | 11355         | 6487956    |
| 65-69     | 10213         | 5728812    |
| 70-74     | 8592          | 4730401    |
| 75-79     | 6924          | 3658125    |
| 80-84     | 4282          | 2507779    |
| 85-89     | 1561          | 1289820    |
| 90-94     | 252           | 413575     |
| 95-99     | 12            | 66480      |
