# Supplementary figures and images for: Two waves of coeliac disease incidence in Sweden: a nationwide population-based cohort study from 1990 to 2015
Source: PubMed Central journal article supplement — Gut. 2021 Jul 28;71(6):1088–94. doi: 10.1136/gutjnl-2021-324209 (PMC9120400; doi:10.1136/gutjnl-2021-324209), 2021-07-28

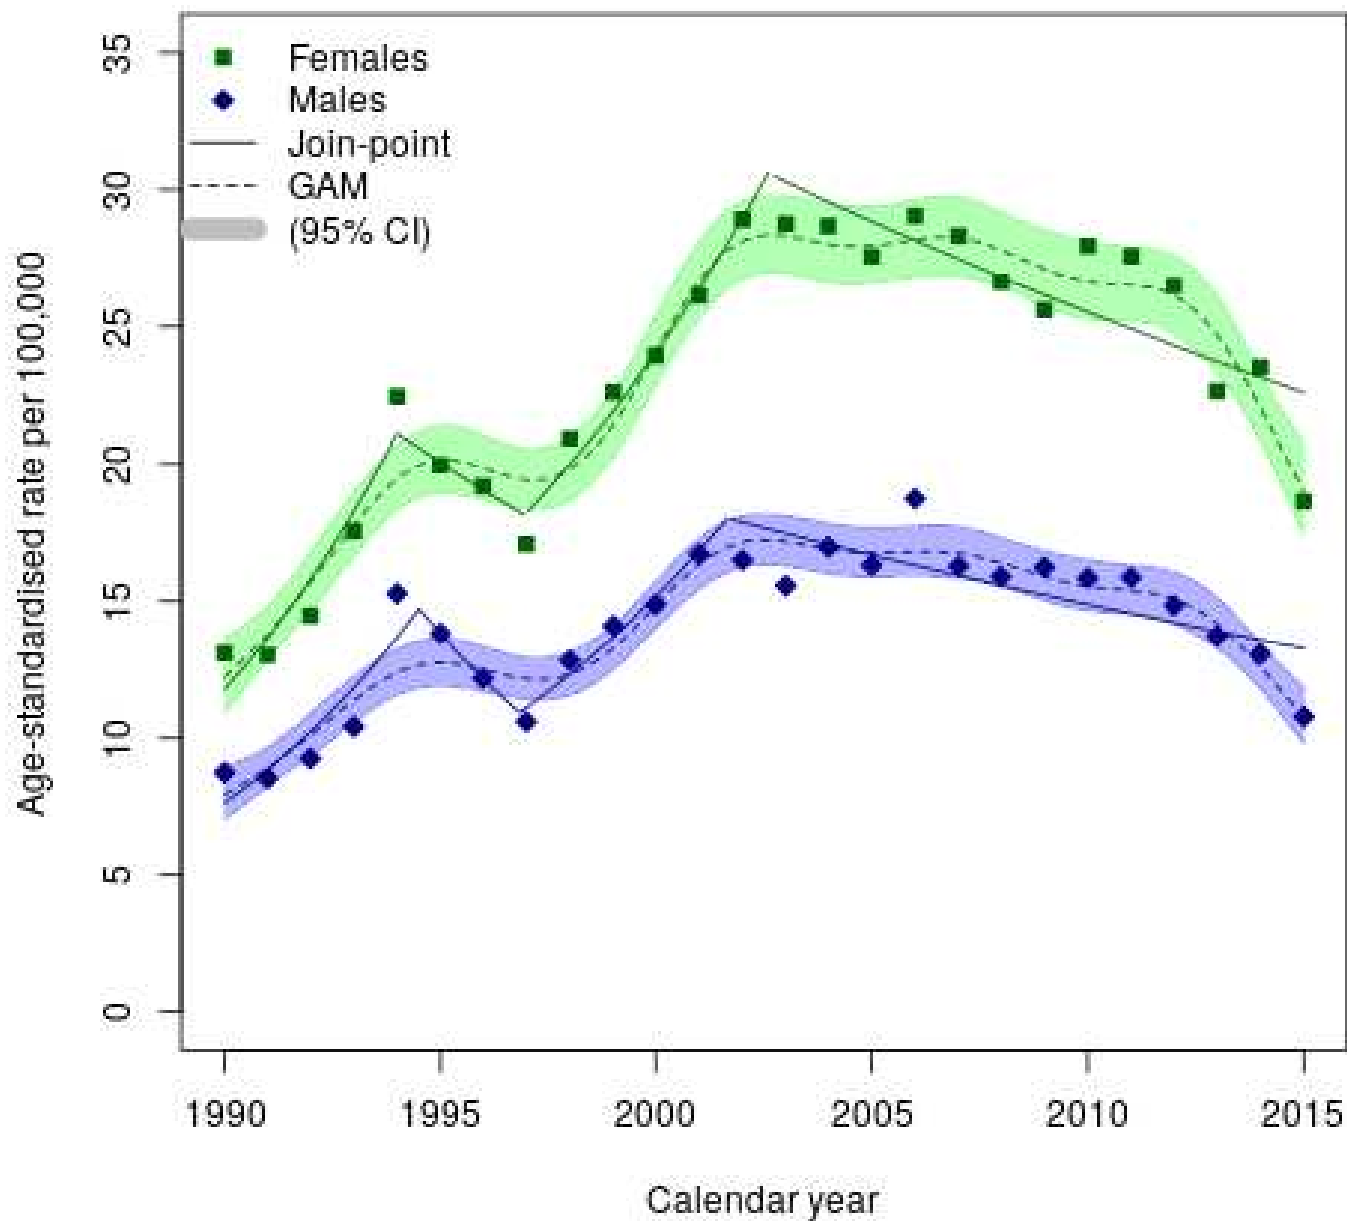

Supplement: gutjnl-2021-324209supp002.pdf [file gutjnl-2021-324209supp002.pdf]

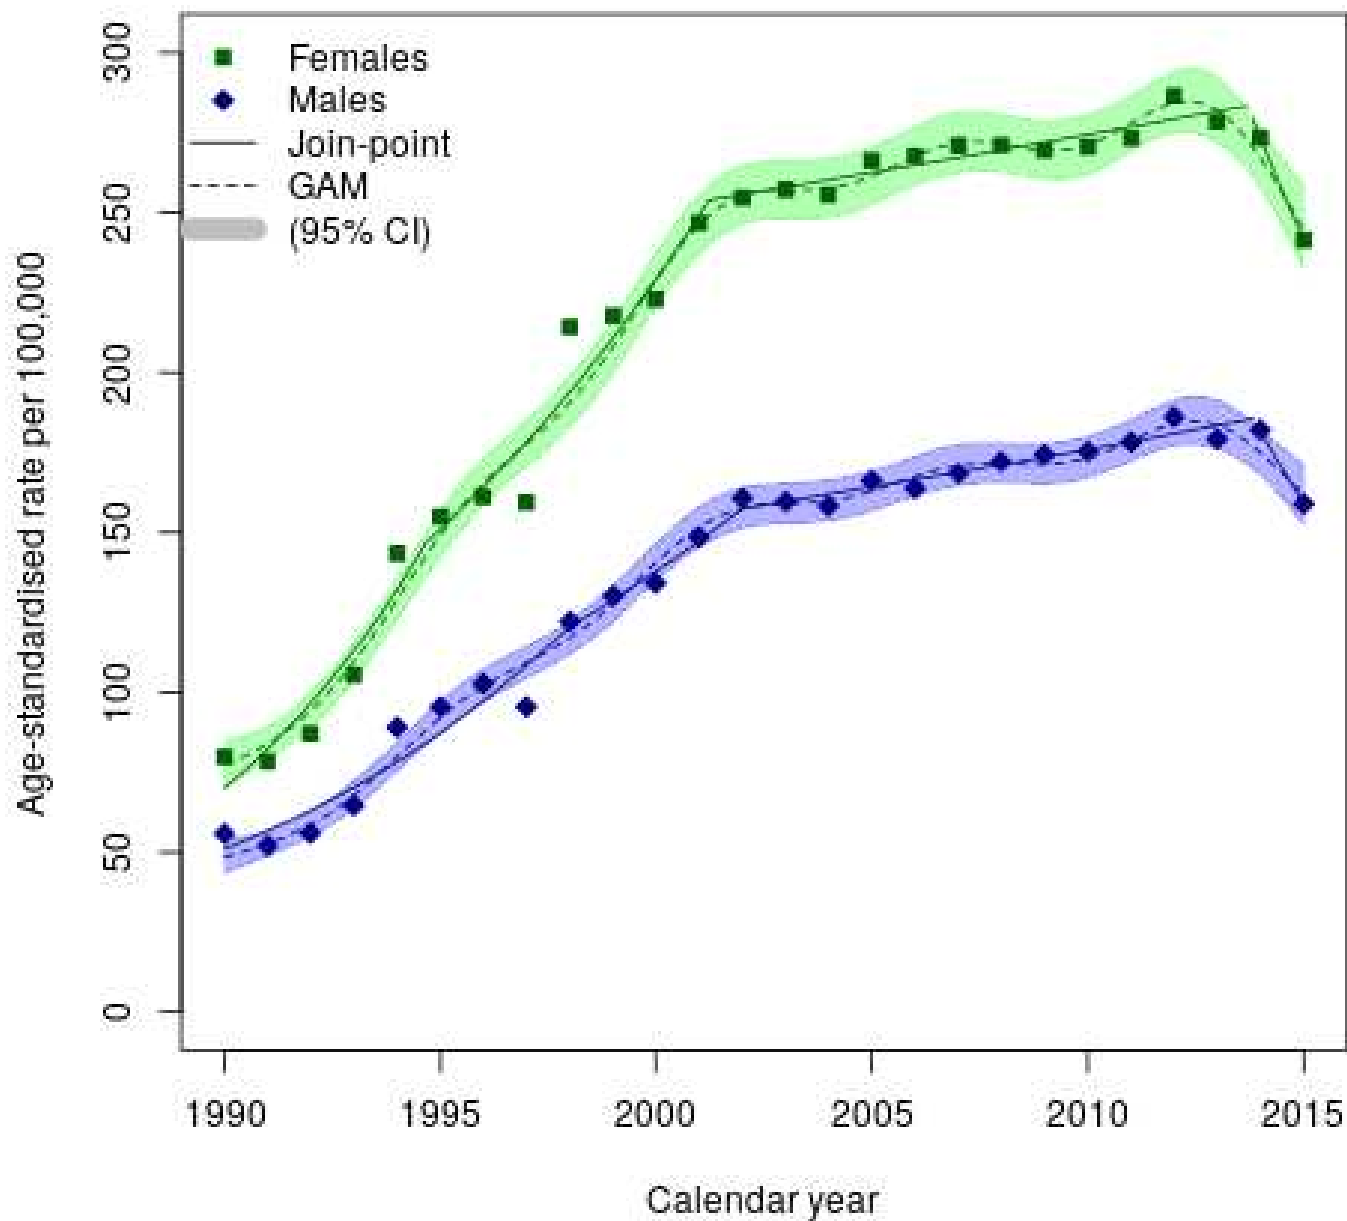

Supplement: gutjnl-2021-324209supp003.pdf [file gutjnl-2021-324209supp003.pdf]

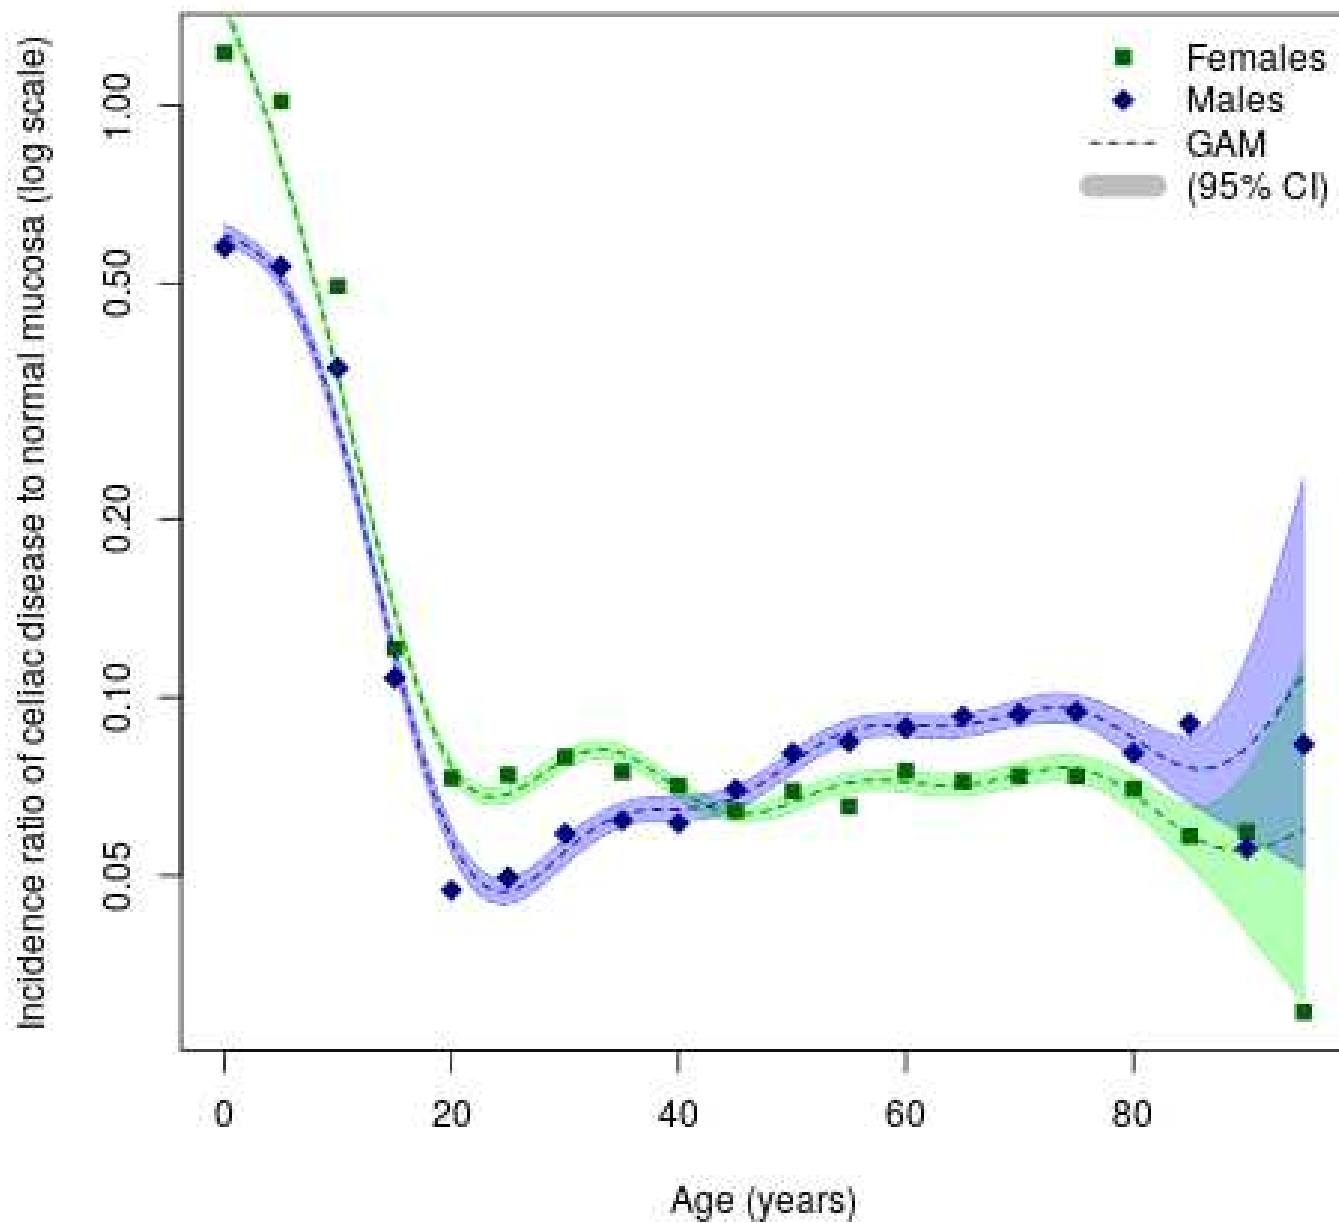

Supplement: gutjnl-2021-324209supp005.pdf [file gutjnl-2021-324209supp005.pdf]

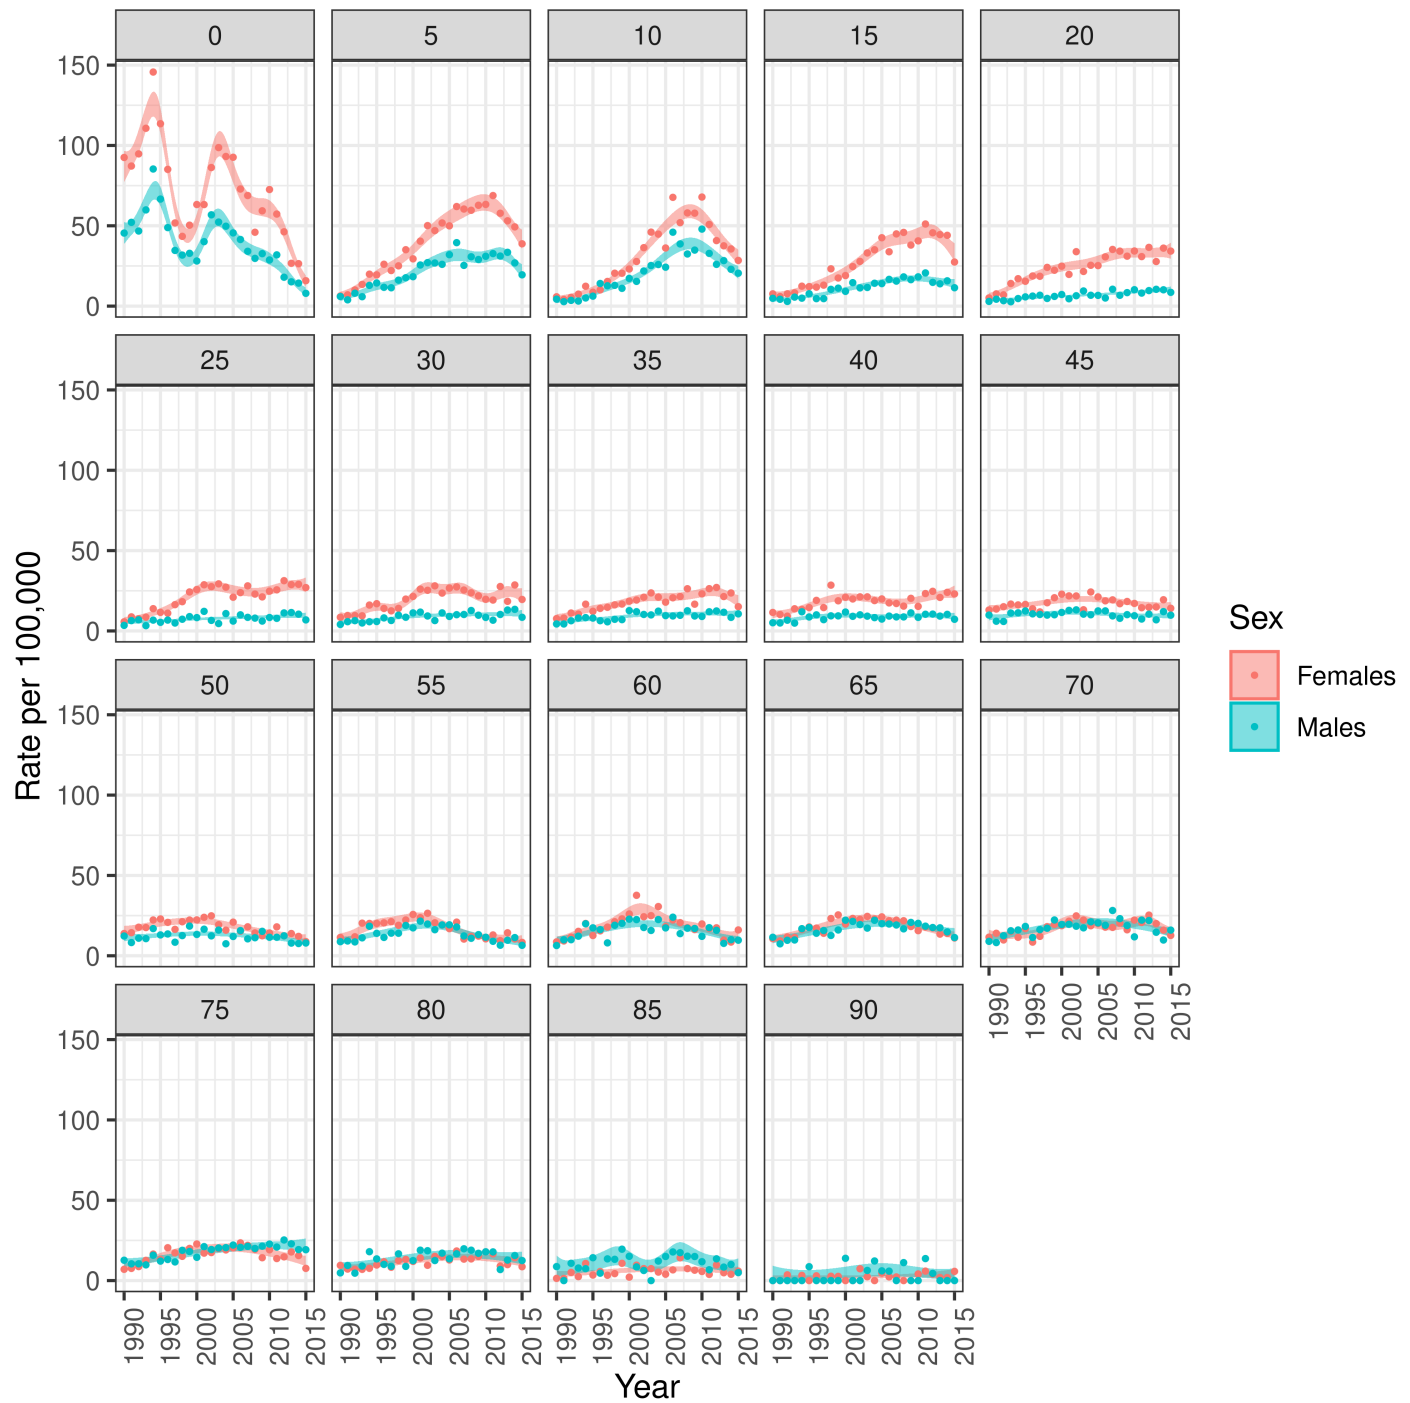

Supplement: gutjnl-2021-324209supp006.pdf [file gutjnl-2021-324209supp006.pdf]

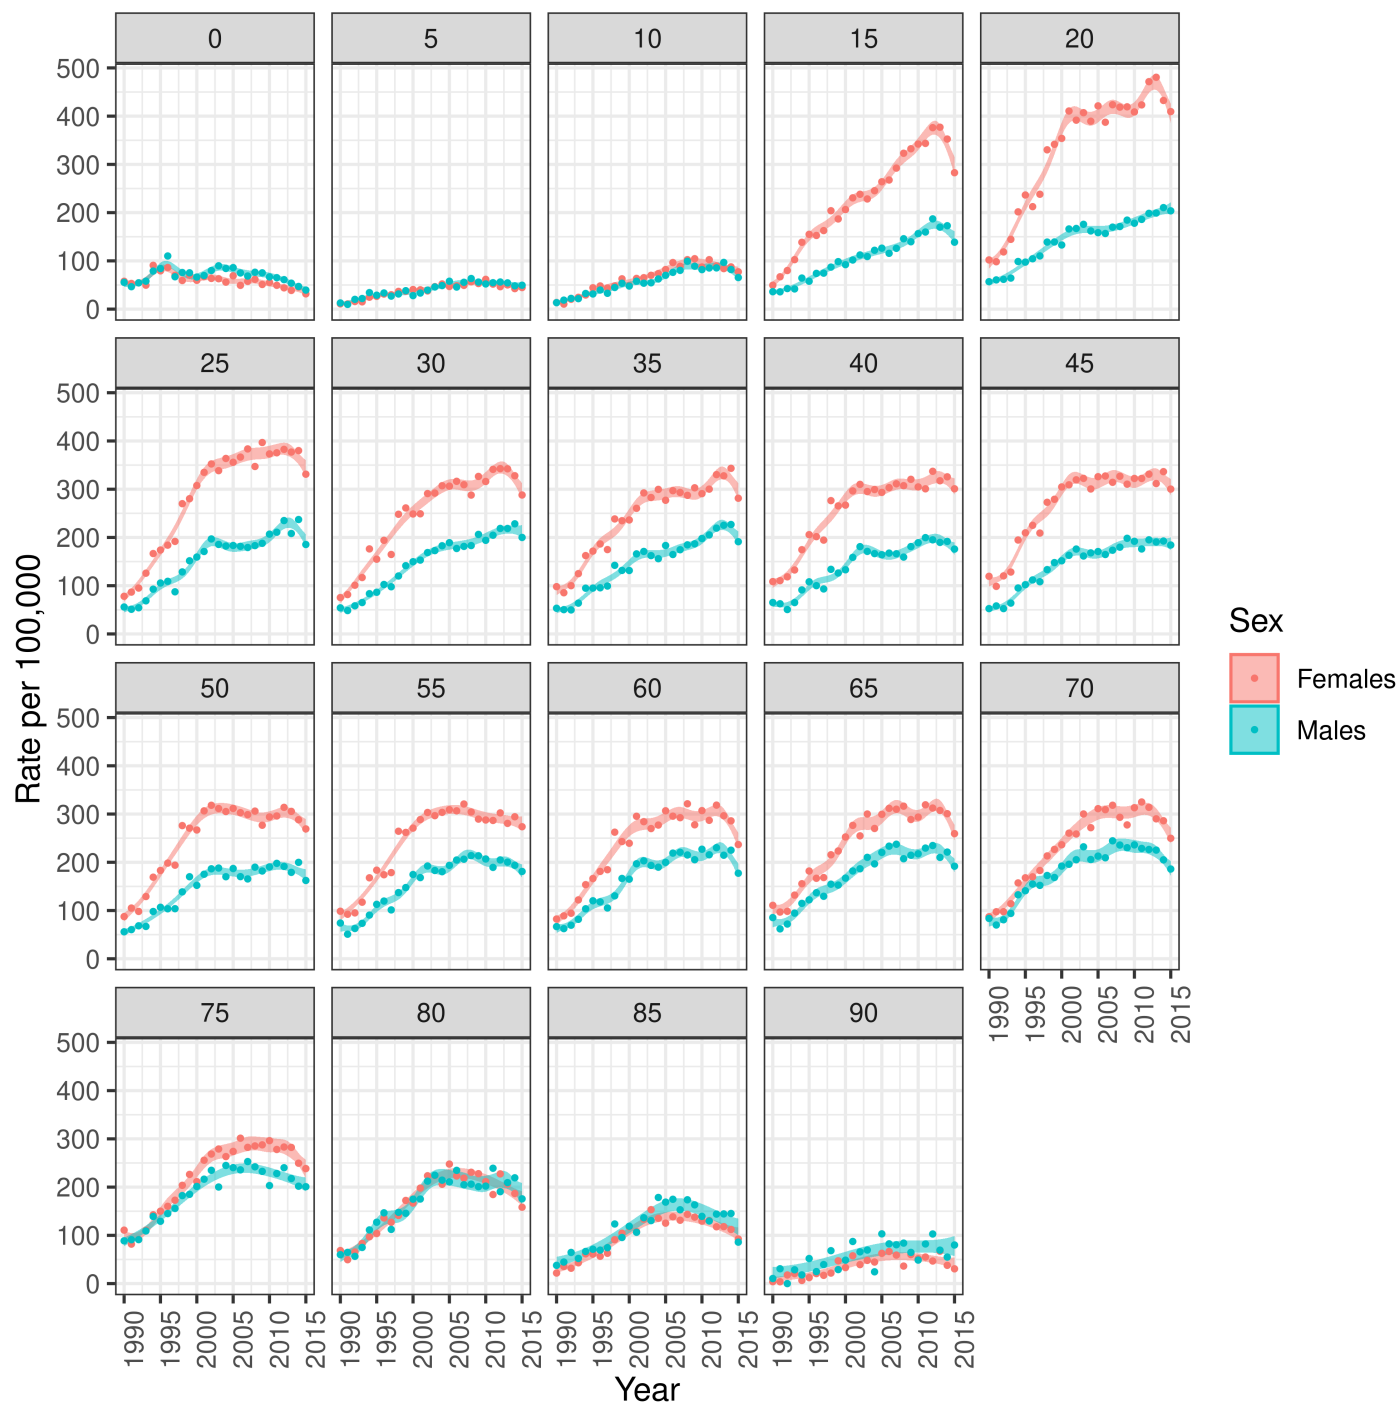

Supplement: gutjnl-2021-324209supp007.pdf [file gutjnl-2021-324209supp007.pdf]
