# Supplementary figures and images for: Two waves of coeliac disease incidence in Sweden: a nationwide population-based cohort study from 1990 to 2015
Source: HighWire-hosted journal article supplement (doi:10.1136/gutjnl-2021-324209), 2021-07-28

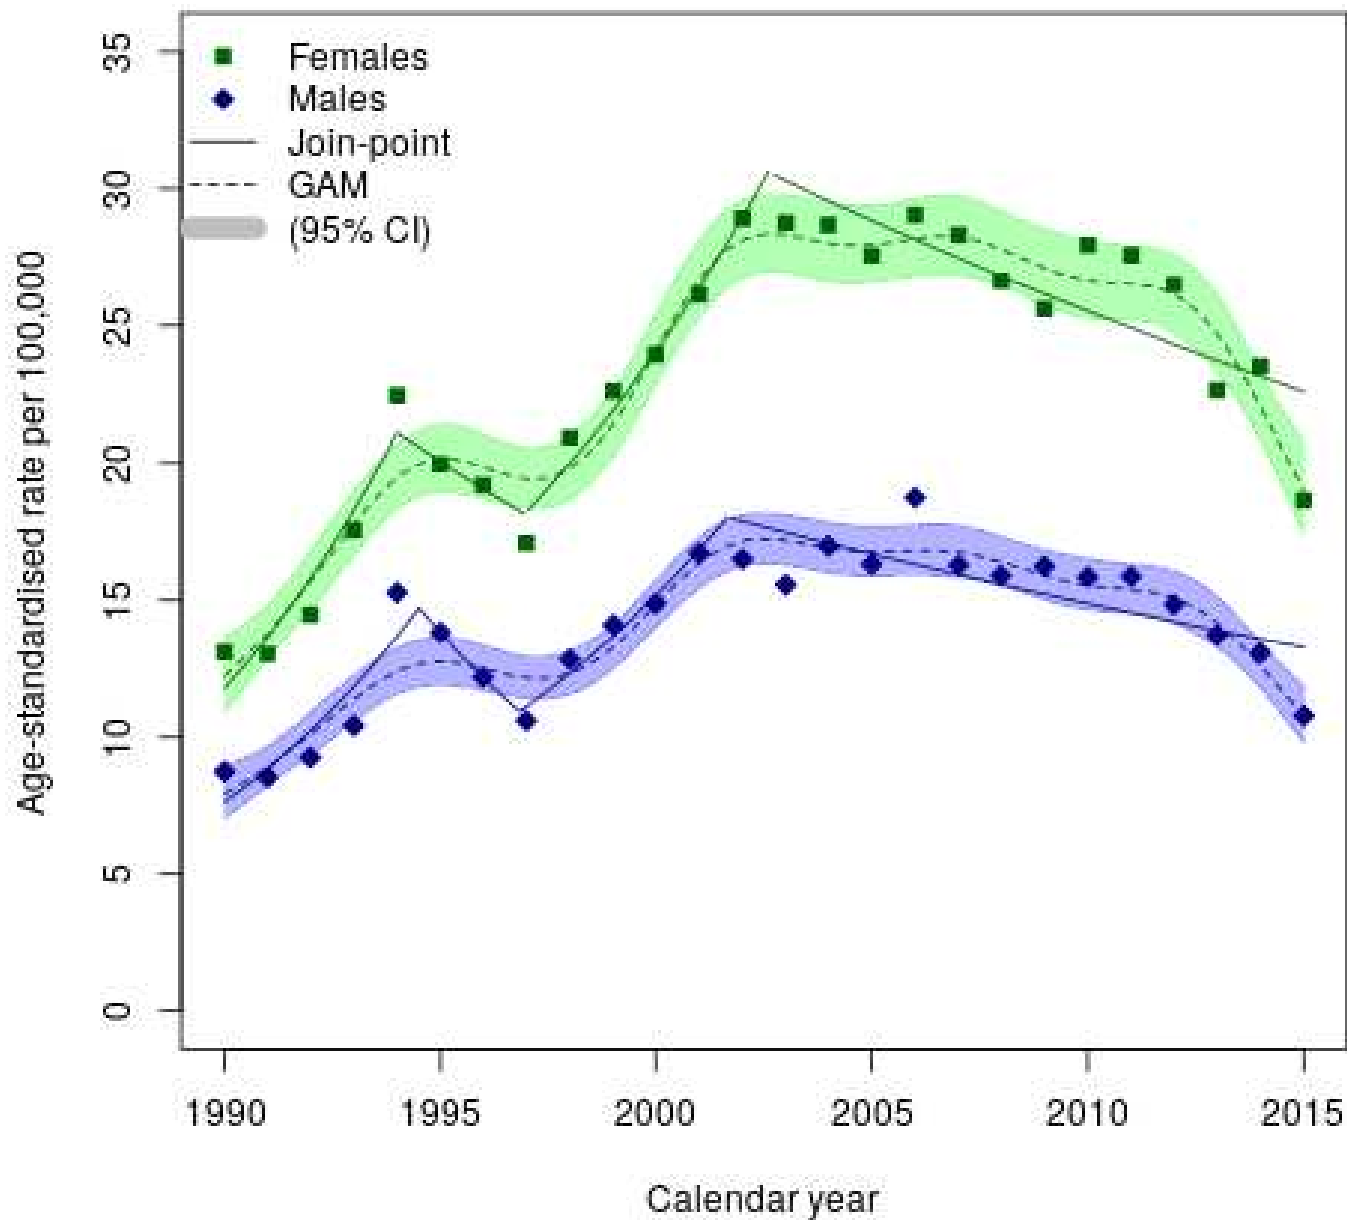

Supplement: gutjnl-2021-324209supp002_data_supplement.pdf [file gutjnl-2021-324209supp002_data_supplement.pdf]

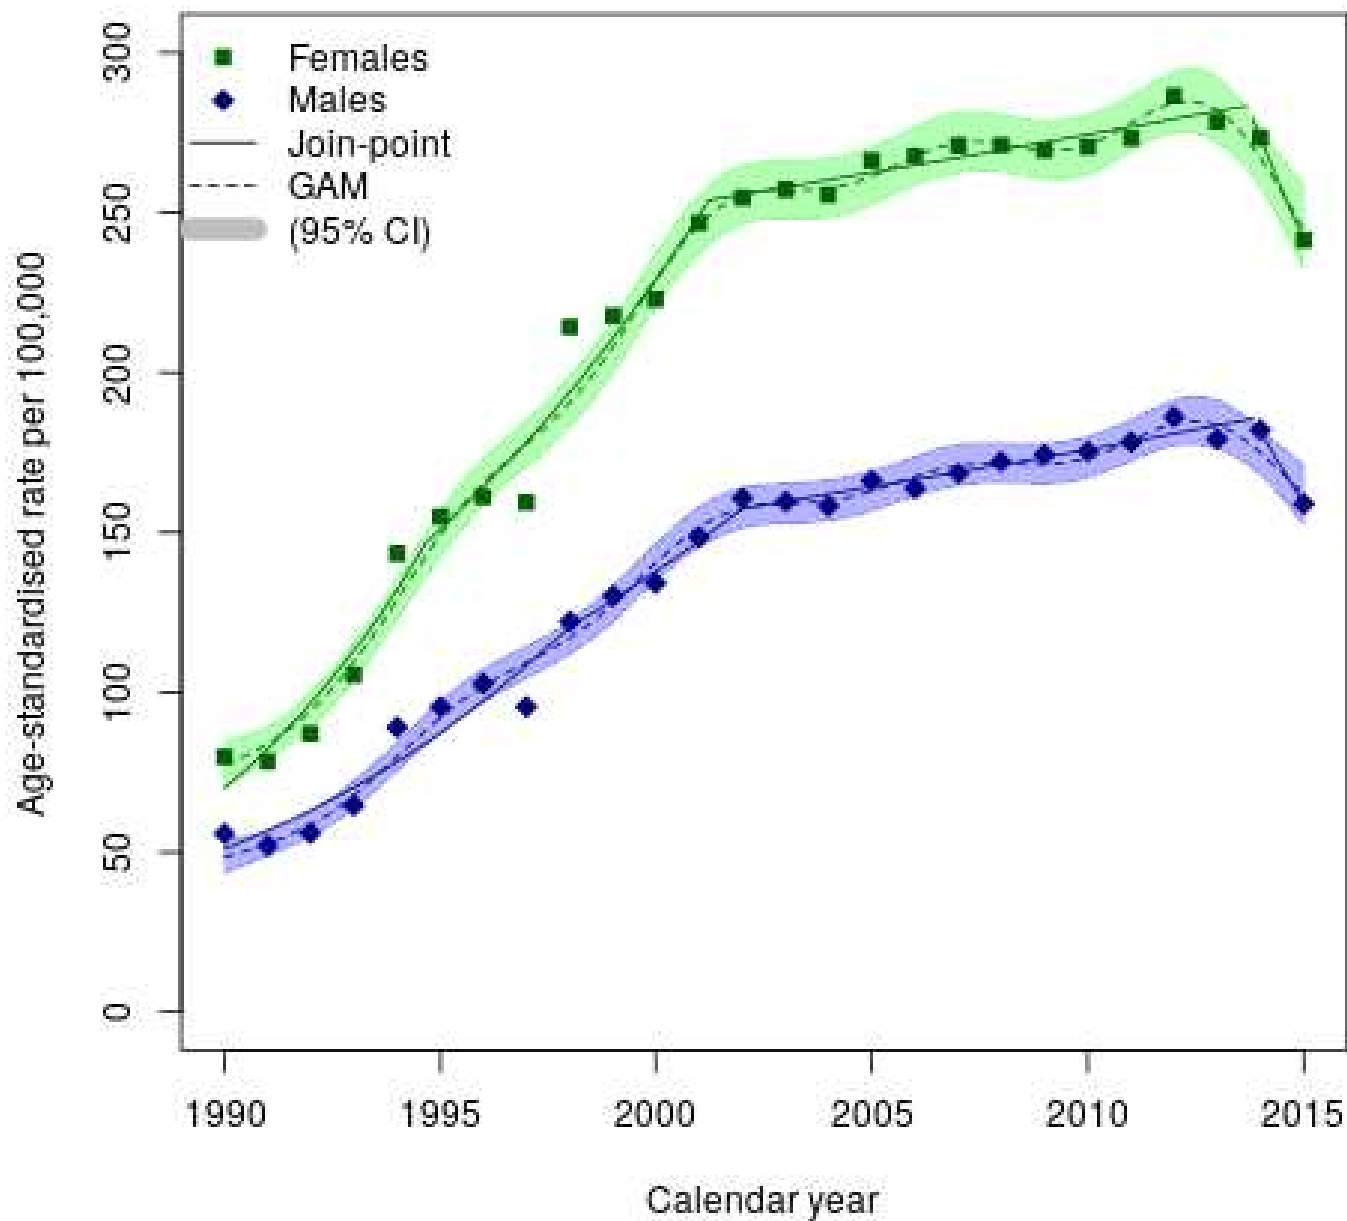

Supplement: gutjnl-2021-324209supp003_data_supplement.pdf [file gutjnl-2021-324209supp003_data_supplement.pdf]

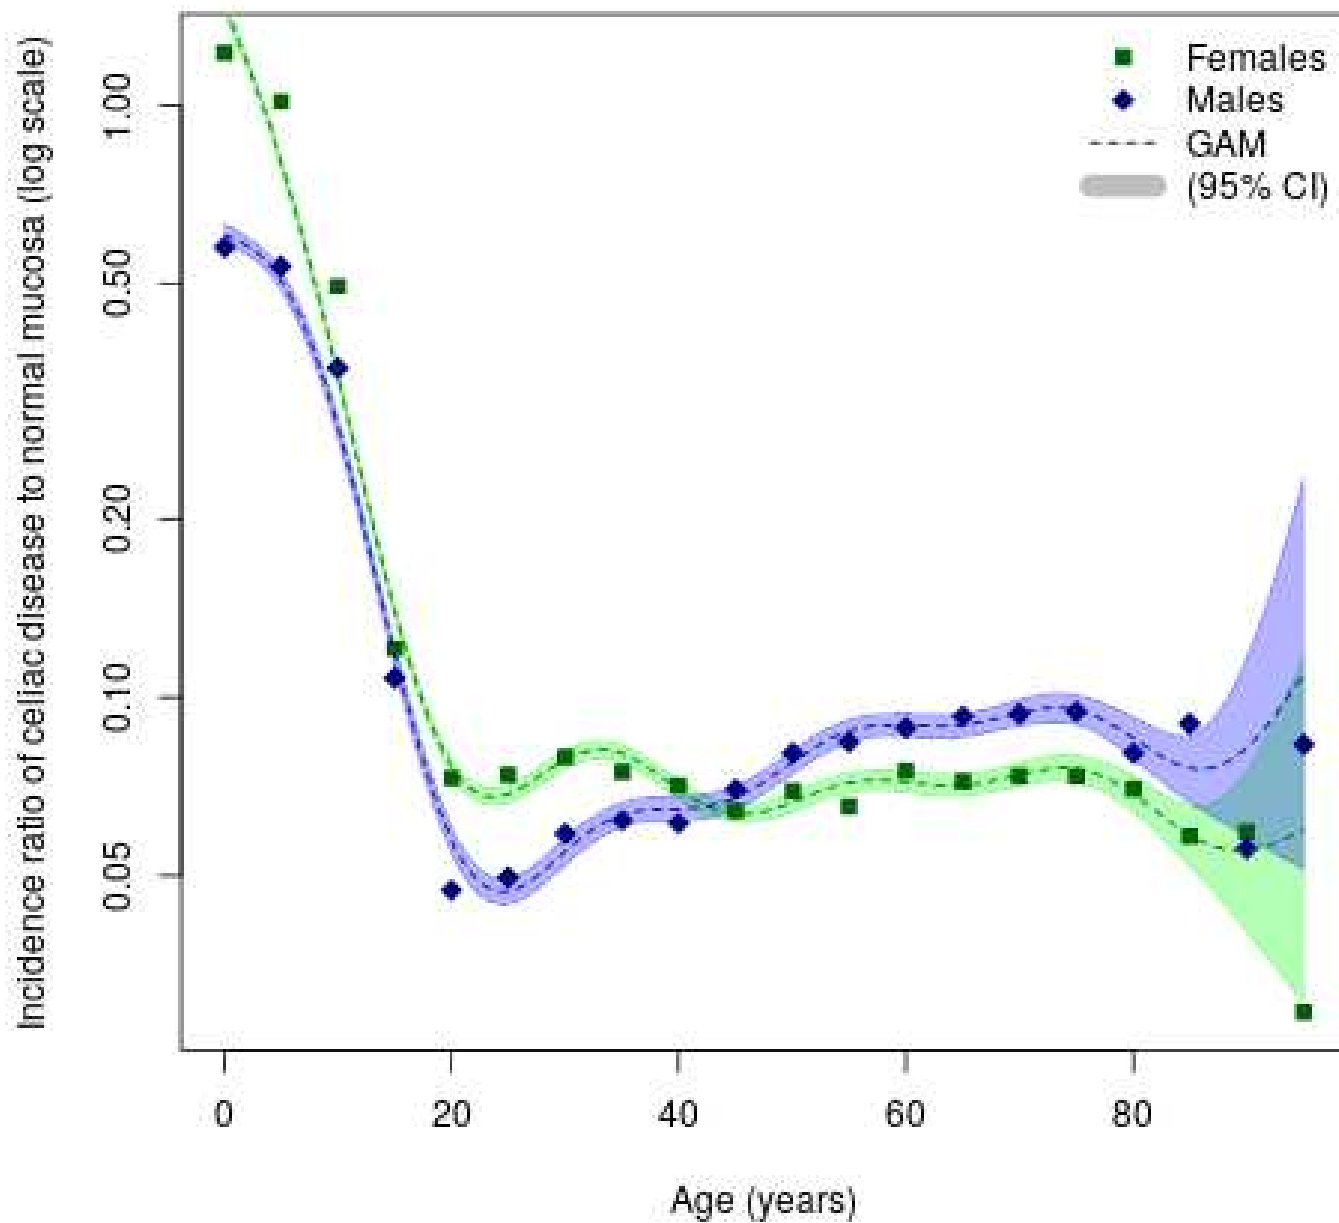

Supplement: gutjnl-2021-324209supp005_data_supplement.pdf [file gutjnl-2021-324209supp005_data_supplement.pdf]

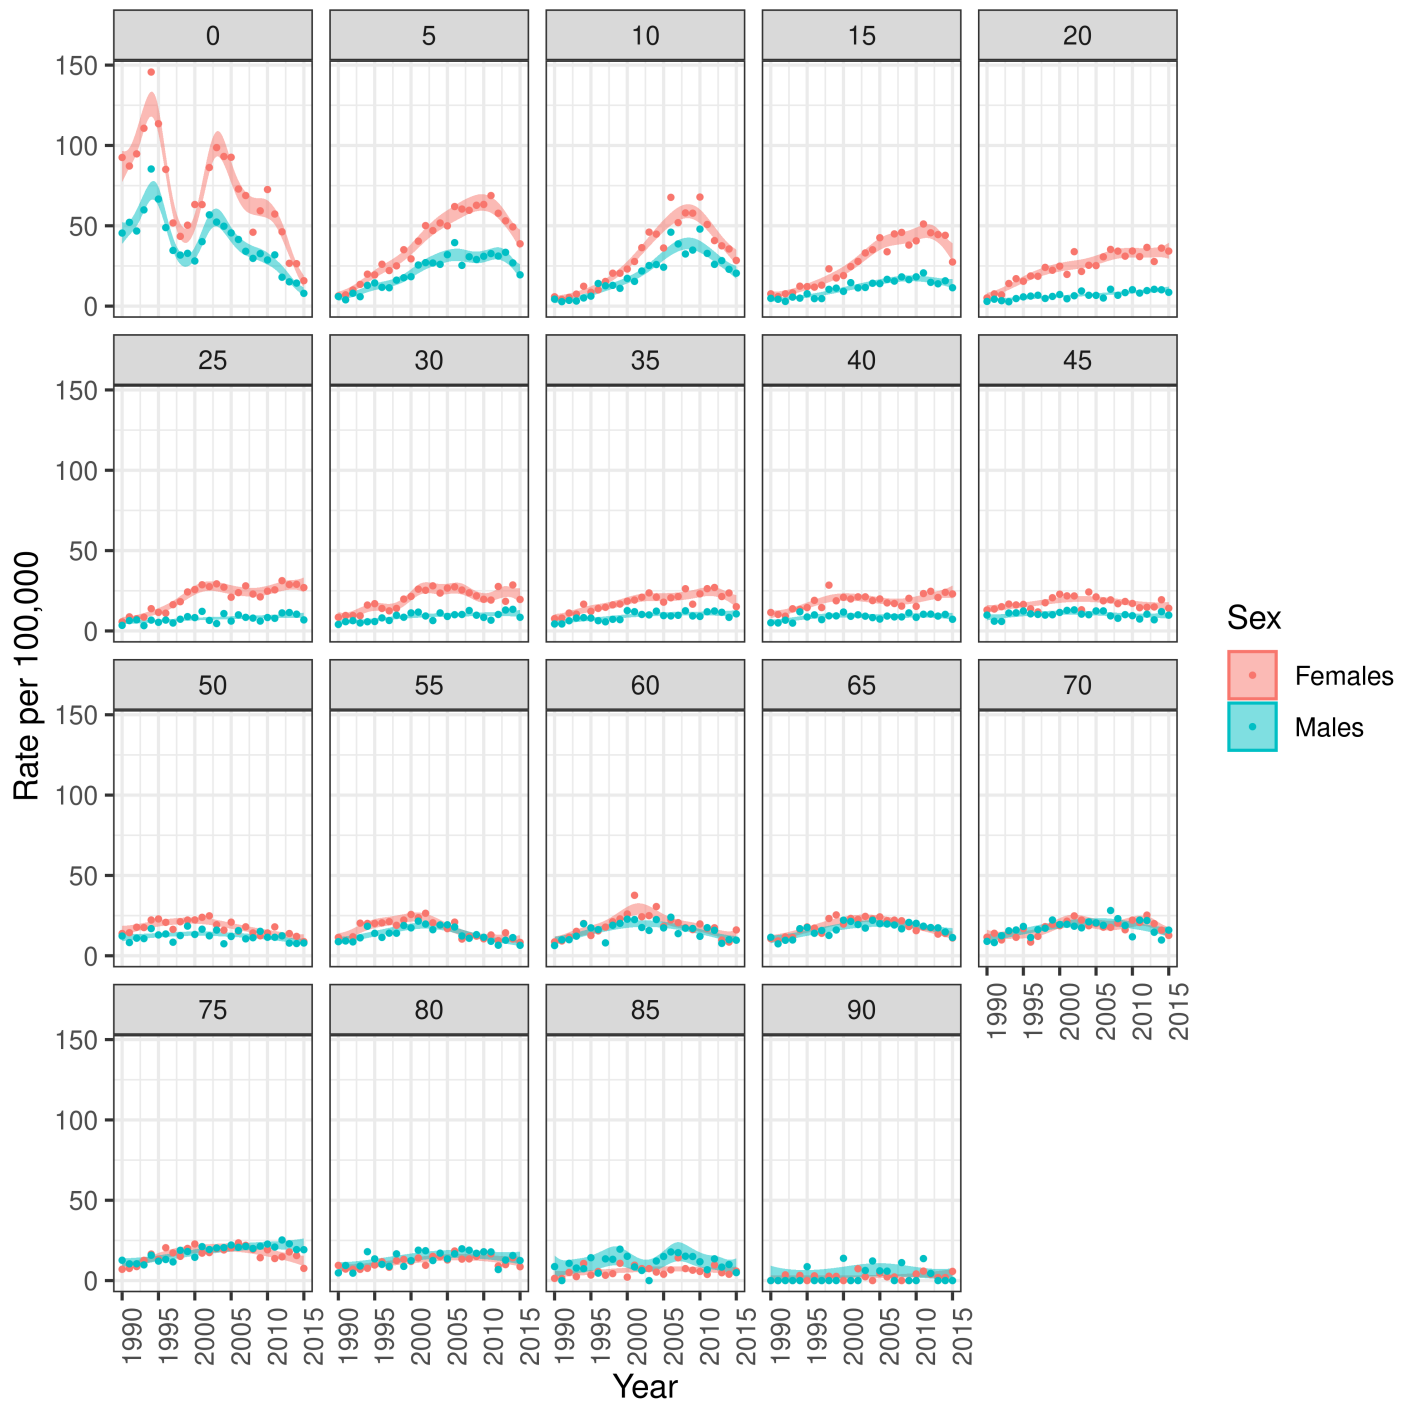

Supplement: gutjnl-2021-324209supp006_data_supplement.pdf [file gutjnl-2021-324209supp006_data_supplement.pdf]
